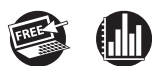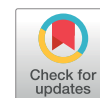

# Weekly Versus Daily Dipeptidyl Peptidase 4 Inhibitor Therapy for Type 2 Diabetes: Systematic Review and Meta-analysis

*Diabetes Care* 2018;41:e52–e55 | <https://doi.org/10.2337/dc17-2095>

Tomohide Yamada,<sup>1</sup>  
Nobuhiro Shojima,<sup>1</sup> Hisashi Noma,<sup>2</sup>  
Toshimasa Yamauchi,<sup>1</sup> and  
Takashi Kadowaki<sup>1</sup>

Once-weekly dipeptidyl peptidase 4 inhibitors (weekly DPP-4is) were recently developed in addition to the once-daily agents (1), and weekly DPP-4is may improve compliance by reducing the burden of medication. Omarigliptin and trelagliptin are the weekly DPP-4is currently available in Japan. We performed a meta-analysis to assess the efficacy and safety of weekly DPP-4is compared with daily DPP-4is and placebo for type 2 diabetes.

This research was carried out according to a predetermined protocol (CRD42017069004) and followed the standard guidelines for conduct and reporting of systematic reviews and meta-analyses (Supplementary Appendices 1 and 2). We searched MEDLINE, EMBASE, and the Cochrane Library up to 16 September 2017. Prospective randomized double-blind trials of weekly DPP-4is performed in adults with type 2 diabetes using an intervention period of at least 12 weeks were identified. Studies were excluded if other aspects of treatment were targeted, if not double-blind (e.g., open-label or crossover), or if the follow-up period was <12 weeks. Studies of children and observational studies were also ineligible. We checked the reference lists of the original studies, review articles, and meta-analyses identified by our searches to find other eligible trials. There

were no language restrictions. Two reviewers independently assessed the studies and extracted data. Bias was analyzed with the Cochrane Collaboration tool. Meta-analysis was performed by a frequentist-based approach with a random-effects model (weekly DPP-4is at the highest dose in each study vs. daily DPP-4is at the highest dose in each study or placebo). Heterogeneity was assessed by using the  $I^2$  statistic. Publication bias was estimated visually by drawing funnel plots and by performing the Begg test and Egger weighted regression test (Supplementary Appendix 9). The arm-specific difference of the mean value from baseline and the odds ratio (OR) were used as measures of effect for continuous and dichotomous variables, respectively. All statistical analyses were done with Stata V.14.0 software, and  $P < 0.05$  was considered to indicate significance.

Among 2,399 candidate studies identified in the electronic databases and other sources, seven randomized trials (2,920 patients) satisfied the inclusion criteria (2–8) (Supplementary Appendices 3–7). The weekly DPP-4i was omarigliptin in five studies and trelagliptin in two studies. The treatment period for the primary end points ranged between 12 ( $N = 2$ ) and 24 ( $N = 5$ ) weeks. The mean age, fasting plasma glucose, hemoglobin A<sub>1c</sub> (HbA<sub>1c</sub>), and BMI were 55–65 years, 8.7–9.5

mmol/L [157–171 mg/dL], 7.5–8.3% [58–67 mmol/mol], and 25–32 kg/m<sup>2</sup>, respectively. These factors were balanced between the groups. Risk of bias was low in these studies, except for sponsorship bias (Supplementary Appendix 7).

Meta-analysis revealed that weekly DPP-4is significantly reduced HbA<sub>1c</sub> by 0.66% (95% CI 0.52, 0.8;  $P < 0.001$ ;  $I^2 = 64\%$ ), fasting plasma glucose by 0.72 mmol/L (0.34, 1.1) [13 mg/dL (6, 20)], and 2-h postprandial glucose by 1.82 mmol/L (0.99, 2.65) [33 mg/dL (18, 48)] compared with placebo. Weekly DPP-4is also increased body weight by 0.59 kg (0.34, 0.84). There was no significant increase of pancreatitis, diarrhea, hypoglycemia, or severe hypoglycemia relative to placebo (Supplementary Appendix 8).

Compared with daily DPP-4is, there were no significant differences in the reduction of HbA<sub>1c</sub>, fasting plasma glucose, 2-h postprandial glucose, the rate of achieving HbA<sub>1c</sub> <7.0%, weight gain, and the incidence of pancreatitis, diarrhea, hypoglycemia, and severe hypoglycemia in patients using weekly DPP-4is (Fig. 1). Heterogeneity among studies was not significant, except for fasting plasma glucose. Publication bias was not significant (Supplementary Appendix 8).

The present meta-analysis failed to show any additional clinical benefit of weekly DPP-4is compared with daily

<sup>1</sup>Department of Diabetes and Metabolic Diseases, Graduate School of Medicine and Faculty of Medicine, The University of Tokyo, Tokyo, Japan

<sup>2</sup>Department of Data Science, The Institute of Statistical Mathematics, Tokyo, Japan

Corresponding author: Tomohide Yamada, [bxq07367@yahoo.co.jp](mailto:bqx07367@yahoo.co.jp).

Received 10 October 2017 and accepted 15 January 2018.

This article contains Supplementary Data online at <http://care.diabetesjournals.org/lookup/suppl/doi:10.2337/dc17-2095/-/DC1>.

© 2018 by the American Diabetes Association. Readers may use this article as long as the work is properly cited, the use is educational and not for profit, and the work is not altered. More information is available at <http://www.diabetesjournals.org/content/license>.

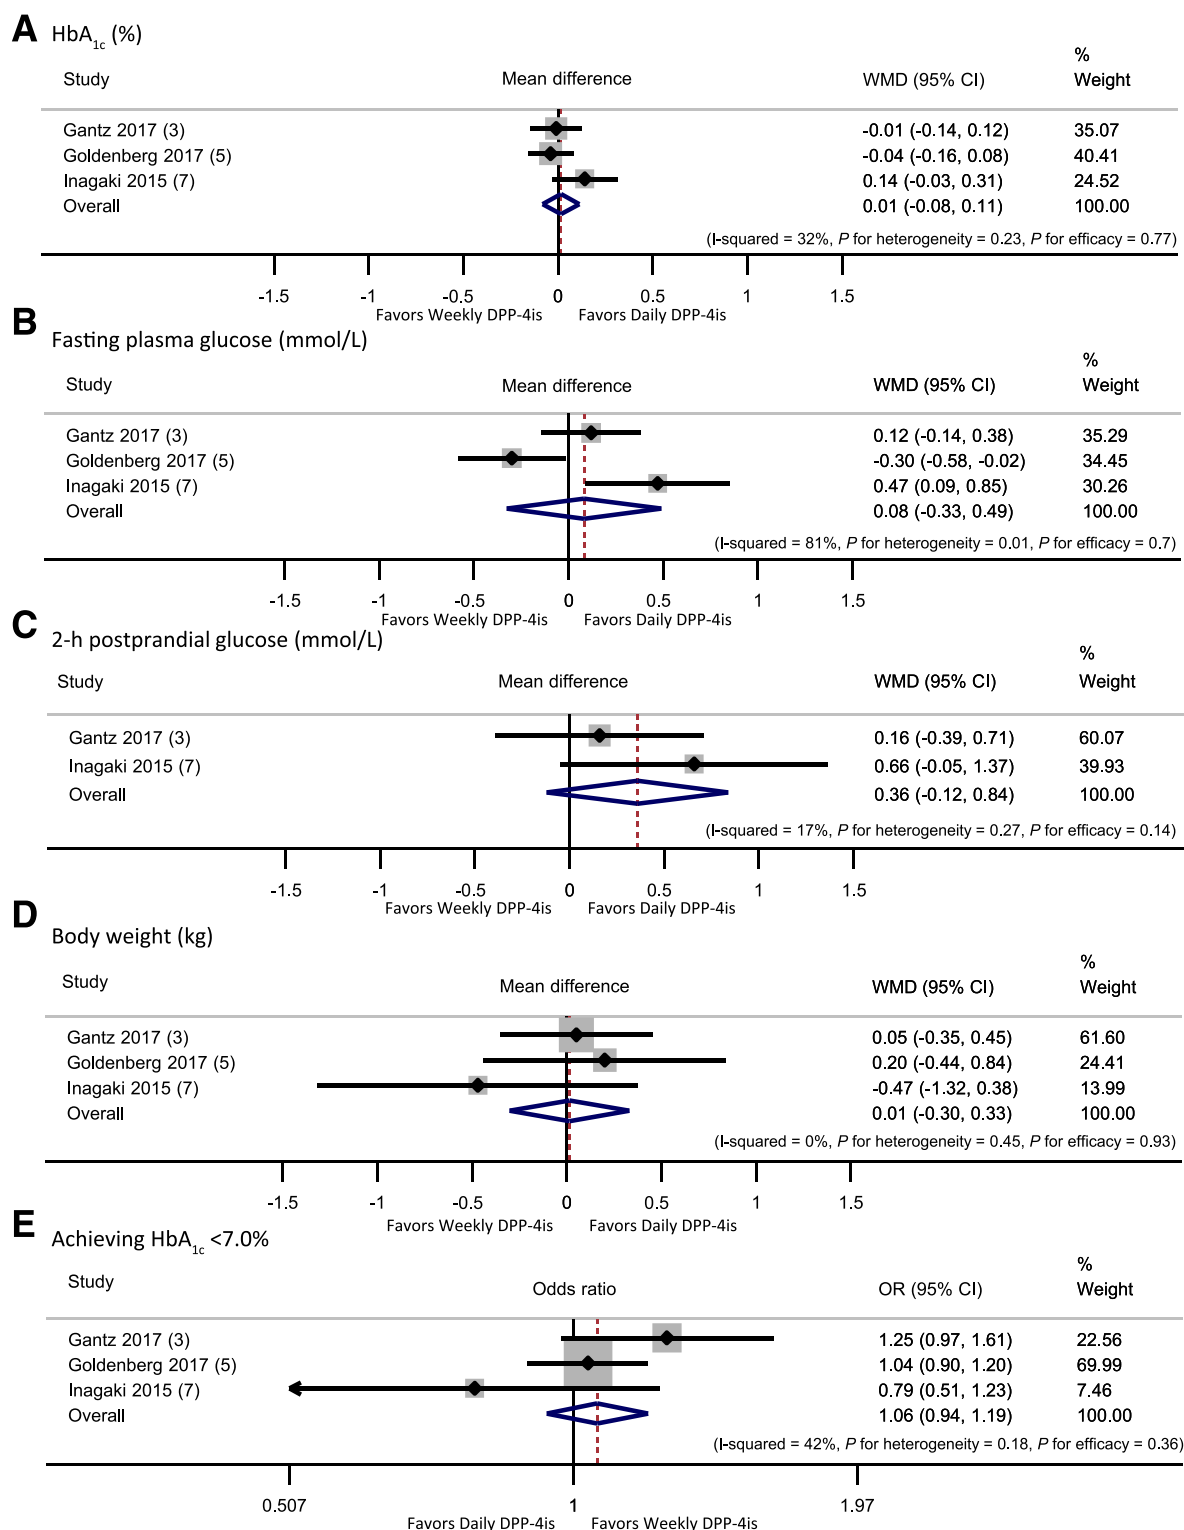

**Figure 1**—Meta-analysis of seven articles (refs. 2–8) comparing weekly DPP-4is with daily DPP-4is for type 2 diabetes. OR was used as a measure of effect for dichotomous variables. When performing meta-analysis, we added 0.5 as the correction factor if no events were reported in the treatment group of a study. A: HbA<sub>1c</sub> (%). B: Fasting plasma glucose (mmol/L). C: Two-hour postprandial glucose (mmol/L). D: Body weight (kg). E: Achieving HbA<sub>1c</sub> <7.0%. F: Diarrhea. G: Pancreatitis. H: Severe hypoglycemia. I: Hypoglycemia. WMD, weighted mean difference.

DPP-4is. However, none of the included studies assessed patient satisfaction with therapy or quality of life. Although large randomized clinical trials have already

assessed important outcomes (effects on macrovascular and microvascular disease) with daily DPP-4is (9,10), this has not been done with weekly DPP-4is.

Do weekly DPP-4is fill an unmet need? Scheen (11) reported that most patients with type 2 diabetes use several drugs to achieve glycemic control and to treat

**F** Diarrhea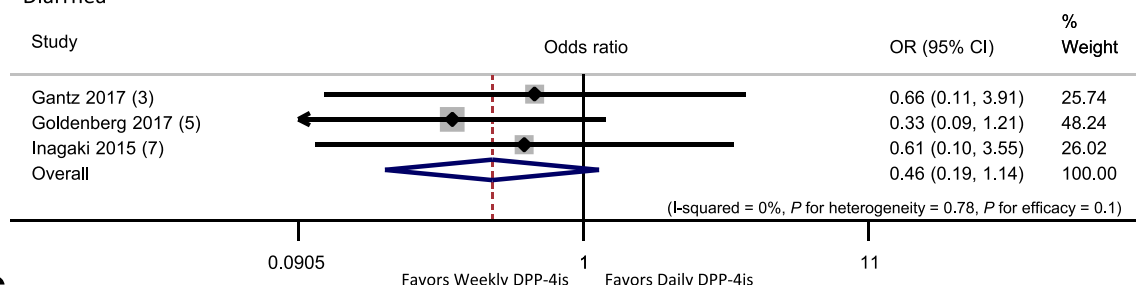**G** Pancreatitis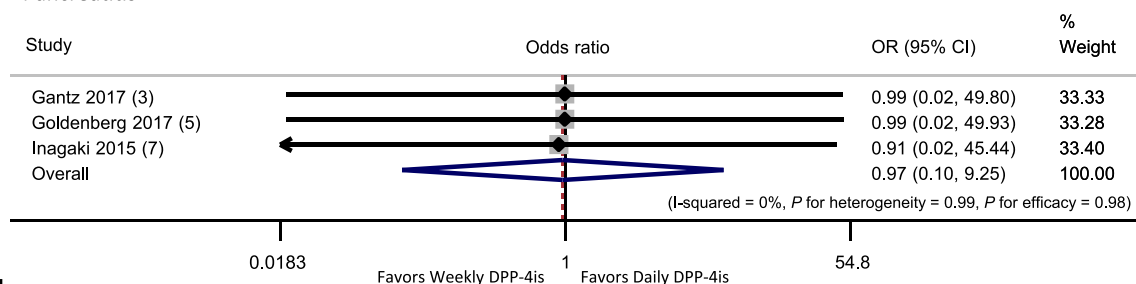**H** Severe hypoglycemia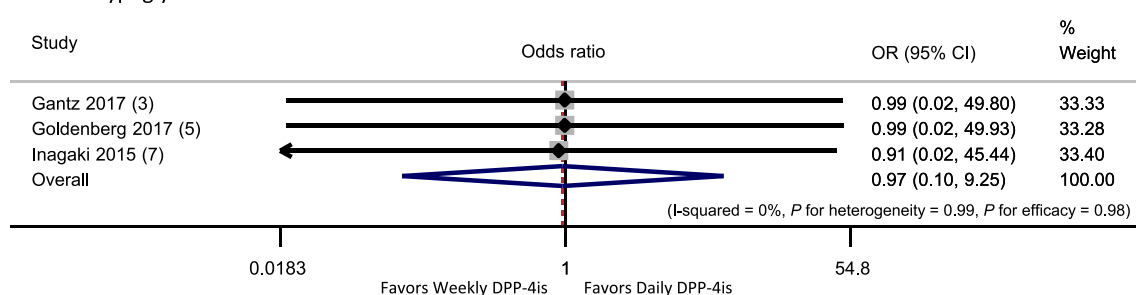**I** Hypoglycemia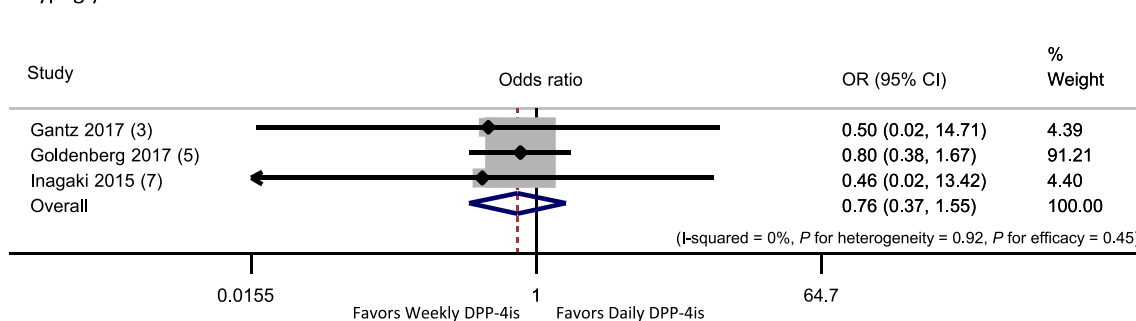

Figure 1—Continued.

hypertension, dyslipidemia, and other comorbidities. It may be easier for patients to keep track of several drugs on the same dosing schedule rather than mixing weekly and daily administration. Accordingly, further studies are needed to determine whether weekly DPP-4is actually improve patient satisfaction, compliance, and quality of life, leading to better long-term control of type 2 diabetes.

If medications for other diseases, including antihypertension drugs, lipid-lowering agents, and antiplatelet agents, are developed

as once-weekly preparations that become widely available in the future, medication compliance might be improved by such once-weekly agents and patient quality of life might be enhanced. From this perspective, once-weekly DPP-4is might be viewed as having reached the market too early but could be an attractive option in the future.

**Funding.** T.Yamad. was funded by The Japan Diabetes Society, Japan Society for the Promotion of Science (16K20965), Japan Health Promotion Foundation, Pfizer Health Research

Foundation, and Japan Foundation for Applied Enzymology.

The authors declare that these funders have not influenced the research.

**Duality of Interest.** No potential conflicts of interest relevant to this article were reported.

**Author Contributions.** T.Yamad. conceived and designed the review. T.Yamad. and N.S. identified reports and extracted data, provided statistical advice, contributed input, and interpreted the data. T.Yamad., N.S., H.N., T.Yamau., and T.K. contributed to data interpretation. T.Yamad. drafted the manuscript, and all other authors critically reviewed it. T.Yamad. is the guarantor of this work and, as such, had full access to all the data in the study and takes responsibility for the integrity of the data and the accuracy of the data analysis.

## References

1. Sheu WH, Gantz I, Chen M, et al. Safety and efficacy of omarigliptin (MK-3102), a novel once-weekly DPP-4 inhibitor for the treatment of patients with type 2 diabetes. *Diabetes Care* 2015;38:2106–2114
2. Shankar RR, Inzucchi SE, Scarabello V, et al. A randomized clinical trial evaluating the efficacy and safety of the once-weekly dipeptidyl peptidase-4 inhibitor omarigliptin in patients with type 2 diabetes inadequately controlled on metformin monotherapy. *Curr Med Res Opin* 2017;33:1853–1860
3. Gantz I, Okamoto T, Ito Y, et al.; Omarigliptin Study 020 Group. A randomized, placebo- and sitagliptin-controlled trial of the safety and efficacy of omarigliptin, a once-weekly dipeptidyl peptidase-4 inhibitor, in Japanese patients with type 2 diabetes. *Diabetes Obes Metab* 2017;19:1602–1609
4. Chacra A, Gantz I, Mendizabal G, et al. A randomised, double-blind, trial of the safety and efficacy of omarigliptin (a once-weekly DPP-4 inhibitor) in subjects with type 2 diabetes and renal impairment. *Int J Clin Pract* 2017;71:e12955
5. Goldenberg R, Gantz I, Andryuk PJ, et al. Randomized clinical trial comparing the efficacy and safety of treatment with the once-weekly dipeptidyl peptidase-4 (DPP-4) inhibitor omarigliptin or the once-daily DPP-4 inhibitor sitagliptin in patients with type 2 diabetes inadequately controlled on metformin monotherapy. *Diabetes Obes Metab* 2017;19:394–400
6. Sheu WH, Gantz I, Chen M, et al. Safety and efficacy of omarigliptin (MK-3102), a novel once-weekly DPP-4 inhibitor for the treatment of patients with type 2 diabetes. *Diabetes Care* 2015;38:2106–2114
7. Inagaki N, Onouchi H, Maezawa H, Kuroda S, Kaku K. Once-weekly trelagliptin versus daily alogliptin in Japanese patients with type 2 diabetes: a randomised, double-blind, phase 3, non-inferiority study. *Lancet Diabetes Endocrinol* 2015;3:191–197
8. Inagaki N, Onouchi H, Sano H, Funao N, Kuroda S, Kaku K. SYR-472, a novel once-weekly dipeptidyl peptidase-4 (DPP-4) inhibitor, in type 2 diabetes mellitus: a phase 2, randomised, double-blind, placebo-controlled trial. *Lancet Diabetes Endocrinol* 2014;2:125–132
9. Green JB, Bethel MA, Armstrong PW, et al.; TECOS Study Group. Effect of sitagliptin on cardiovascular outcomes in type 2 diabetes. *N Engl J Med* 2015;373:232–242
10. White WB, Cannon CP, Heller SR, et al.; EXAMINE Investigators. Alogliptin after acute coronary syndrome in patients with type 2 diabetes. *N Engl J Med* 2013;369:1327–1335
11. Scheen AJ. Once-weekly DPP-4 inhibitors: do they meet an unmet need? *Lancet Diabetes Endocrinol* 2015;3:162–164
